# Supplementary material
Source: Springer Nature journal article supplement (https://www.springermedizin.de/resource/supplementary/13063_2008_296_MOESM4_ESM.pdf/9618082)
Supplement: MOESM4 [file 9618082]

## Evaluation of Vaginal Bleeding in Patients Treated with LUAL

|                                          |              |       |
|------------------------------------------|--------------|-------|
| <b>Bleeding Chart Score<sup>1)</sup></b> | Preoperative | _ _ _ |
|                                          | 1 month      | _ _ _ |
|                                          | 2 month      | _ _ _ |
|                                          | 3 month      | _ _ _ |
|                                          | 4 month      | _ _ _ |
|                                          | 5 month      | _ _ _ |
|                                          | 6 month      | _ _ _ |
|                                          | 7 month      | _ _ _ |
|                                          | 8 month      | _ _ _ |
|                                          | 9 month      | _ _ _ |
|                                          | 10 month     | _ _ _ |
|                                          | 11 month     | _ _ _ |
|                                          | 12 month     | _ _ _ |

### 1) Bleeding chart score

|            | Pad                                                                                 | / | / | / | / | / | / |
|------------|-------------------------------------------------------------------------------------|---|---|---|---|---|---|
| Slightly   |  |   |   |   |   |   |   |
| Moderately |  |   |   |   |   |   |   |
| Heavily    |  |   |   |   |   |   |   |

**Bleeding Chart Score = {Slightly×1}+{Moderately×5}+{Heavily×20}**
